# Supplementary material
Source: MDPI journal article supplement (https://www.mdpi.com/2071-1050/6/7/4059)
Supplement: s1 [file s1]

## Sheet: Data_ALL
C1_DEM（meter）	distance_from_river(meter)	C3_vegetation type	C4_food_bamboo	C5_slope(°)	C6_aspect(°)	DENSITY	ANN_result
1987	2114.99	3	1	9.76879	131.267	1	0.912849
2602	2199.74	5	1	36.9419	37.4091	1	1.38563
2693	1811.5	3	1	11.8715	347.36	1	0.454605
1649	383.497	3	1	31.0836	68.6216	1	1.13589
1594	4538.29	3	1	22.7666	131.647	1	1.0483
1091	248.621	3	1	8.35886	268.023	1.31831	0.917488
1464	1019.34	3	1	22.6428	298.644	1.63662	1.06503
691	664.414	3	1	4.34416	215.039	1	0.692459
880	1585.34	1	1	25.0249	264.448	1	0.72096
1295	2492.08	3	1	30.9887	323.878	1	1.00183
1327	936.509	3	1	28.1623	162.339	1.63662	1.002
2213	2315.04	3	1	16.737	79.1982	1.31831	0.858519
1637	3058.6	3	1	25.4589	151.169	1	1.12511
2111	1595.51	3	1	32.9016	94.8252	1	1.15839
2541	1545.07	5	1	21.2495	302.374	1.63662	1.90394
2426	795	3	1	41.7095	107.2	1	1.3467
1648	1501.35	3	1	39.4661	212.147	1.95493	1.14039
1564	653.175	3	1	25.7728	102.463	1	1.13186
1593	594.258	1	1	16.406	358.066	1	1.15506
1778	1521	3	1	15.396	294.711	1	0.98381
2486	2847.08	3	1	28.6738	43.5955	1	1.4267
814	5646.42	3	1	13.3125	373.325	1	0.635337
1051	2865.05	3	1	15.3237	97.4191	1	1.02431
1316	2877.9	3	1	24.9794	180.57	1	1.04672
1832	2891.64	3	1	41.6863	254.636	1	1.222
1682	3328.85	3	1	35.7001	-1.1156	1	1.10561
2213	4834.05	1	1	10.7894	318.909	1	-0.181258
2778	3313.68	5	1	14.88	190.295	1	0.943482
2752	2577.3	3	1	21.8071	136.966	1	1.2187
1640	3162.35	3	1	14.816	71.6934	1	0.965003
1169	665.77	3	1	29.1725	24.9797	1	1.06069
1083	1047.21	1	1	11.9163	210.952	1	0.508916
1784	3932.23	3	1	25.0513	266.134	1	1.0601
1086	233.102	3	1	33.0862	327.79	1	1.17724
1159	556.837	3	1	15.4511	124.553	1	0.879422
1606	1039.56	1	1	19.933	172.27	1	0.925997
1238	959.381	3	1	32.8029	253.423	1	0.967891
1835	2365.41	3	1	16.0563	163.347	1	1.0493
969	721.62	3	1	16.2801	267.548	1	0.908441
768	2547.79	3	1	14.3123	175.072	1	0.711953
862	852.263	3	1	32.9181	110.723	1	0.934971
702	738.815	3	1	14.4979	242.125	1	0.801813
682	555.202	3	1	13.927	336.667	1	1.20511
1081	1119.25	3	1	17.751	157.381	1	0.83955
1188	3076.01	1	1	10.0224	116.918	1	0.88334
797	749.81	3	1	16.3926	41.0065	1	0.939508
1148	650.795	3	1	20.1366	202.93	1	0.870159
1092	237.171	3	1	14.5322	228.266	1	0.875824
1833	1680.67	3	1	36.3697	394.844	1	1.24891
2137	5022.87	3	1	24.7032	256.082	1	1.00747
936	520.038	1	1	12.9643	281.088	1	0.831597
1006	579.229	1	1	14.9872	23.1776	1	0.855091
1396	543.716	3	1	12.2135	303.161	1	1.0169
1628	484.201	3	1	9.70187	108.481	1	1.00778
1873	1357.81	3	1	27.2482	376.902	1	1.24714
1724	2059.43	3	1	8.33127	15.3806	1	0.864261
1592	1018.45	3	1	20.3268	296.98	1	1.06037
1146	75.1128	3	1	10.895	57.6067	1	0.951938
1330	624.301	3	1	11.8818	29.7054	1	1.06564
1421	855.144	3	1	8.95313	-13.3624	1	1.0099
1498	452.346	3	1	10.7002	182.618	1	0.879054
2949	2682.69	5	1	40.6589	306.582	1	1.59157
2275	869.279	3	1	32.5423	180.867	1	1.26012
2255	1020.22	3	1	15.713	117.81	1	0.996716
719	1245.09	3	1	7.226	85.0523	1	0.720737
895	985.773	3	1	7.81796	151.119	1	0.68756
764	580.702	3	1	9.9421	76.0792	1	0.747982
4245	746.213	1	1	27.8649	80.326	2.59155	2.06413
4518	747.295	1	1	50.7121	253.144	2.90986	1.64757
4201	683.118	1	1	42.527	104.014	1.63662	3.20982
4564	974.374	1	1	51.5817	140.58	1.63662	2.2446
4324	4192.76	1	1	20.979	36.3349	1.95493	1.14124
3525	4422.18	5	1	26.8162	86.5857	1.31831	2.56726
3891	797.402	5	1	27.9828	180.499	2.59155	3.03188
4254	6911.89	1	1	37.698	186.153	1	0.872463
4308	5058.76	1	1	25.4943	244.097	1.63662	1.07935
3636	4921.88	1	1	27.8406	181.268	1	2.1889
3580	1347.16	5	1	26.0805	11.1586	4.1831	3.39149
4120	1575	1	1	15.3329	86.21	1.31831	1.59286
4026	556.938	1	1	31.9541	19.2627	3.54524	2.84017
4189	285	1	1	29.8236	155.609	1.9798	2.57033
1096	616.644	3	1	15.8631	-13.8385	1	1.04006
1014	1294.7	1	1	13.5514	144.719	1	0.536852
808	736.376	1	1	5.93366	306.823	1	1.11205
1246	687.059	3	1	11.4923	181.574	1	0.823866
1346	1189.64	1	1	6.9129	274.291	1	0.648555
1185	4317.55	3	1	7.64541	53.5974	1	0.942391
1594	3968.68	3	1	15.0824	140.344	1	1.01176
1434	3199.85	1	1	22.8712	137.059	1	1.34438
999	1300.25	3	1	16.0952	91.8759	1	0.941251
920	1139.5	1	1	12.4632	105.411	1	0.498956
1374	2453.86	3	1	17.708	-11.8346	1	0.948205
1470	1442.65	3	1	19.8068	145.139	1	1.04577
1229	571.32	3	1	35.8549	328.074	1	1.18225
1220	694.874	3	1	22.0291	-21.6912	1	1.01538
1247	530.354	1	1	26.1339	52.1317	1	1.20681
1200	1192.67	3	1	9.73381	274.851	1	0.876106
1424	321.012	3	1	39.0674	178.559	1	1.04528
1659	2003.16	3	1	19.1022	47.6907	1	1.02107
1295	768.668	3	1	6.82761	257.395	1	0.857233
1341	530.675	3	1	16.1053	286.729	1	1.01222
1256	610.777	3	1	4.22931	219.215	1	0.779444
1805	705.2	3	1	37.8375	150.685	1	1.20295
1781	1229.11	1	1	12.9534	309.818	1	0.844339
1694	101.44	3	1	20.8619	177.647	1	1.02273
1484	233.822	3	1	27.5687	180.88	1	1.0018
1928	556.965	3	1	10.4039	341.433	1	1.06262
2121	1104.92	3	1	23.6709	52.6374	1	1.04093
2676	826.226	5	1	36.1409	266.548	1	1.46489
2638	1813.57	3	1	26.522	57.9595	1	1.41465
2961	2495.33	3	1	17.7751	263.918	1	0.896387
2874	3347.72	5	1	29.347	193.42	1	1.73212
2004	356.017	3	1	17.7847	149.513	1	1.10046
2060	981.555	3	1	24.7912	238.335	1	1.0935
1504	854.967	3	1	4.04397	346.349	1	1.05334
2888	3147.07	3	1	29.8645	22.0793	1	2.96176
2561	1013.14	3	1	24.1894	88.9623	1	1.15321
2177	854.078	3	1	19.9416	96.5093	1	1.07038
2520	736.376	3	1	18.0423	145.913	1	1.02507
2283	916.106	3	1	22.8898	35.1442	1	1.01958
1653	427.163	3	1	21.6285	267.758	1	1.06024
2142	883.091	3	1	19.589	346.225	1	1.14674
2127	649.346	3	1	26.7355	283.493	1	1.11334
2131	687.242	3	1	8.89125	284.283	1	0.88306
2413	1086.02	3	1	32.4684	145.25	1	1.26632
2607	2006.3	3	1	32.618	371.708	1	1.11538
2598	1488.71	3	1	26.5008	123.23	1	1.2385
2170	2892.24	1	1	6.08059	121.111	1	0.603177
1969	1023.74	3	1	1.91616	211.58	1	0.701141
1589	435	3	1	12.3879	311.383	1	1.05461
1698	1217.3	3	1	9.70469	363.701	1	1.06442
1640	869.026	3	1	22.2826	70.1786	1	1.11423
986	318.195	3	1	12.0794	292.061	1	0.995467
1161	616.644	3	1	20.8268	313.46	1	1.06789
914	1324.25	3	1	17.2134	229.151	1	0.805544
1211	918.955	3	1	25.7125	280.772	1	1.01756
1036	646.568	3	1	16.0247	34.912	1	1.02636
1031	736.367	1	1	13.2048	22.911	1	0.866487
1271	962.107	3	1	40.3698	262.814	1	0.974712
1028	445.717	3	1	15.5524	227.068	1	0.858273
1757	2261.47	3	1	37.7128	287.031	1	1.08366
1640	2249.5	3	1	21.1163	241.751	1	0.975215
1967	2877.89	3	1	36.6075	227.884	1	1.23985
1422	1107.36	3	1	28.4112	111.405	1	1.11556
1090	1770.66	3	1	23.521	221.913	1	0.851184
929	653.569	3	1	18.0464	308.331	1	1.019
891	724.051	3	1	5.16228	315.715	1	1.08482
1261	1085.2	3	1	19.0285	182.203	1	0.886765
748	465.242	3	1	6.30792	293.202	1	1.04058
1083	1575	1	1	16.465	300.441	1	0.775562
1193	404.073	3	1	20.3548	237.857	1	0.94081
1299	1970.55	3	1	17.7713	61.0675	1	1.06598
1417	1469.23	3	1	14.9372	78.4304	1	1.07306
1229	1018.67	3	1	15.6122	192.077	1	0.848786
677	861.423	3	1	3.2508	175.081	1	0.590186
950	194.857	3	1	46.3335	270.056	1	1.00697
891	610.808	3	1	27.1629	134.131	1.31831	0.844438
1466	1468.01	3	1	34.9866	305.728	1	1.05681
914	1671	3	1	5.94321	188.847	1	0.669006
839	1670.46	3	1	15.5396	328.813	1	0.968409
1011	2608.88	3	1	22.9531	207.025	1.31831	0.837165
840	4917.48	3	1	8.43788	87.9655	1	0.985073
729	2552.03	3	1	9.78937	70.1349	1	0.915672
1349	3025.76	3	1	12.9459	276.208	1	0.824098
722	2019.29	3	1	9.84118	9.23685	1	0.986046
686	1162.06	3	1	5.91655	132.782	1	0.603924
761	2415	3	1	11.4474	103.378	1	0.842392
1062	1751.6	3	1	12.5591	183.819	1	0.776872
1341	2761.39	3	1	3.99234	144.85	1	0.878492
1347	3025.47	3	1	29.7955	11.0714	1	1.00246
1019	1300.25	3	1	37.2217	391.975	1	1.24023
861	23.8362	3	1	27.8168	111.122	1	0.845765
997	1448.18	3	1	35.1024	129.055	1	1.00721
1436	1539.24	3	1	9.37143	239.974	1	0.841264
1451	2622.99	3	1	22.4342	173.897	1	1.06565
1294	3105.91	3	1	19.1484	130.338	1	1.06778
1400	1365	3	1	23.0656	319.336	1	1.07701
1532	1600.58	3	1	27.9283	111.679	1	1.13243
1292	1161.31	3	1	48.435	36.5979	1	1.03395
935	1194.22	3	1	7.60144	115.686	1	0.75152
1427	897.246	3	1	17.1937	232.707	1	0.928164
1245	2359.67	3	1	31.7486	339.38	1	1.05072
1075	717.922	1	1	16.1927	21.096	1	1.00741
1226	2687.05	3	1	36.4812	114.748	1	1.10575
780	1155.1	3	1	6.63	153.529	1	0.636856
1148	2342.29	3	1	34.3346	326.541	1	1.01084
1590	5051.64	3	1	41.5503	320.932	1	1.107
894	2012.51	3	1	22.8685	342.218	1	1.00432
1114	1365	3	1	31.8384	170.193	1	0.94742
1826	1249.42	3	1	33.535	226.865	1	1.12989
1526	3278.45	3	1	45.8286	30.1733	1	1.13351
1471	1353.16	3	1	17.1492	319.513	1	1.04245
1136	3664.24	3	1	25.7798	171.323	1	1.04883
1011	1095	3	1	23.3232	102.854	1	0.966817
1068	1677.54	1	1	16.4343	111.746	1	0.757336
1171	1492.33	3	1	27.1312	332.322	1	1.08711
1570	1209.9	3	1	33.9817	317.264	1	1.11507
1428	797.402	3	1	31.9579	10.051	1.31831	1.03869
1319	724.425	3	1	47.884	22.6981	1.63662	1.02215
1445	883.052	3	1	37.4587	126.594	1.63662	1.13559
1779	746.09	3	1	34.8255	-15.4601	1.63662	1.02876
2270	1285.63	3	1	30.5102	70.7495	1	1.15004
2582	3479.29	3	1	51.8784	103.925	1	2.30024
1608	1375.06	1	1	33.9809	327.076	1	1.24756
1810	1335.08	3	1	8.77335	44.8983	1	0.951853
2157	1534.55	3	1	9.76112	283.37	1	0.796354
2230	3227.82	3	1	18.2721	350.585	1	0.821748
1847	654.866	3	1	30.445	60.4733	1	1.1173
1630	1095.1	3	1	25.1483	255.552	1	1.01254
1068	386.654	3	1	22.3195	135.758	1.31831	0.872646
1154	1016.25	3	1	28.7866	219.043	1.31831	0.902324
1051	342.775	1	1	34.0223	75.84	1.31831	1.04985
1265	2233.84	3	1	11.6773	236.838	1	0.810036
1386	2436.2	3	1	9.42456	316.083	1	0.875998
1259	1862.57	3	1	18.1788	273.627	1	0.910394
2365	516.703	5	1	14.6878	85.6443	1	1.05707
2386	574.325	3	1	39.9726	141.595	1	1.3137
2847	1125.13	5	1	27.6362	257.47	1	1.66901
2270	2552.86	5	1	37.5609	321.177	1	1.61021
2661	1093.46	5	1	30.17	267.21	0.978862	1.63923
1750	1755.06	3	1	28.1048	111.116	2.45229	1.139
1173	2609.22	3	1	10.8905	294.957	1	0.8278
1422	1463.75	3	1	18.6827	137.548	1	1.0354
1551	1179	3	1	41.258	332.785	1	1.11616
1061	2871	3	1	30.3866	154.32	1	1.04125
996	1277.29	3	1	9.84096	31.5293	1	1.00782
764	1587.03	3	1	9.85765	263.857	1	0.770531
908	3132.76	3	1	12.4379	-9.97466	1	0.960644
927	3255.13	3	1	13.1755	265.041	1	0.734722
922	2835.99	3	1	13.1759	258.593	1	0.745887
777	2248.7	3	1	22.0968	200.374	1	0.747204
813	2936.71	3	1	14.6351	178.936	1	0.744164
824	4111.69	3	1	8.84878	175.177	1	0.771264
786	3766.7	1	1	6.5019	114.748	1	0.631845
1824	679.148	3	1	5.38303	149.344	2.27324	0.889886
1534	104.738	3	1	26.2186	339.585	2.59155	1.23262
2229	649.346	3	5	44.7013	147.94	2.59155	4.97609
2275	45.527	3	2	18.4826	110.713	2.90986	5.84831
1881	1095.1	3	1	35.0195	335.163	1.31831	1.16051
2294	3242.57	3	5	26.8536	142.947	3.22817	5.24978
2573	1118	3	5	29.6612	81.774	1.95493	5.40098
2040	1139.41	3	5	57.0311	325.929	2.59155	3.28341
2222	387.103	3	5	21.8867	319.489	2.27324	3.68422
1537	312.674	3	5	32.3329	279.331	2.90986	3.28538
3168	2727.41	5	2	10.5655	187.142	2.27324	4.64282
1587	720.028	3	5	39.1807	300.973	3.21822	3.51705
1904	2059.43	3	5	39.5763	275.306	3.23812	5.36268
2825	1254.52	5	5	19.4842	124.549	2.27324	6.00574
1111	134.794	3	5	19.8737	197.084	2.59155	2.71583
1557	675.208	1	2	32.4684	93.7343	3.05782	6.13919
2831	939.388	5	5	19.681	313.762	2.5816	5.16763
1356	87.4867	3	5	14.8388	89.5085	3.22817	4.90592
1442	900.25	3	5	50.3295	51.0937	3.54648	3.99182
1706	1665.61	3	1	31.1668	308.973	2.57041	1.06929
1036	449.499	3	1	30.5968	317.966	3.22941	1.12552
2584	318.549	3	5	24.3581	247.835	2.66118	5.63329
1901	542.083	3	2	26.2594	104.685	3.89587	5.80312
2125	297.365	3	5	39.3427	302.757	3.86479	4.61472
2617	1268.01	3	5	38.4179	133.739	4.1831	5.56503
2687	492.32	5	5	41.9437	125.877	2.59155	5.20312
2808	1431.93	5	5	31.8186	125.487	4.50141	5.97042
1790	818.566	3	5	15.8569	137.84	4.50141	5.59892
2019	339.748	3	5	35.0601	206.741	3.51415	5.39943
2753	675	5	2	17.5989	165.664	4.50141	5.63286
2872	742.613	5	5	46.8455	84.8329	4.34225	5.60532
2915	1576.78	5	5	29.7662	5.56334	6.09296	6.26426
1872	504.484	1	5	45.334	151.745	4.82096	3.75425
1872	504.484	1	5	45.334	151.745	4.82096	3.75425
2380	572.953	3	5	28.8085	276.423	5.45634	5.43145
1513	170.398	3	5	40.4325	238.867	4.1831	3.67216
2118	488.116	3	5	29.6514	159.219	4.81972	5.7463
3131	913.154	5	5	17.949	165.008	6.72958	6.5635
3297	1347.16	5	5	23.8069	79.1805	5.45634	7.29862
2907	1371	5	5	9.046	313.438	5.45634	4.12164
1984	3178.94	3	5	31.2964	169.262	3.86479	5.3549
2231	48.8881	3	5	26.2803	191.484	5.80698	5.83951
2928	628.285	5	5	6.77767	204.208	4.50141	5.06836
3772	705.159	1	2	35.4483	137.265	4.50141	5.98796
2680	1327.71	5	5	34.4038	321.644	5.45634	5.26511
1638	2439.52	3	5	39.1643	45.0042	2.27324	4.05213
1973	382.613	3	5	35.993	28.4817	4.81972	4.73607
2250	106.53	3	5	49.7703	98.2697	6.09296	4.56182
2734	192.245	5	5	39.7941	32.2862	5.77465	5.57526
2994	879.027	5	2	32.3758	49.5311	4.1831	4.2245
2349	705	3	5	51.7202	139.06	5.45634	4.57032
2101	571.183	3	5	18.3256	101.568	5.13803	5.85935
3275	1254.45	5	2	21.4454	117.089	4.81972	5.14687
3191	805.543	5	5	15.6632	178.019	4.1831	6.47762
1367	1531.03	3	1	26.451	172.26	1.63662	1.01878
3158	765	5	5	32.1126	287.256	4.1831	5.80164
2326	355.98	3	5	43.9678	162.768	3.86479	5.23615
2083	44.4504	3	5	27.8222	327.423	3.22817	3.48606
3301	493.407	5	5	35.5232	381.632	2.90986	2.68863
3040	429.01	5	5	66.0707	116.714	2.59155	2.41944
3185	1729.75	5	2	28.5429	138.672	1.31831	5.21277
2781	643.386	3	5	37.337	135.68	2.27324	6.02965
1819	1685.95	3	5	31.8152	291.378	1.95493	4.86108
1645	1862.54	3	1	27.9755	378.77	2.90986	1.20806
2081	2800.54	3	5	24.9765	282.631	3.22817	5.75017
1960	2097.08	5	5	45.0166	244.223	4.50141	4.37641
1960	2097.08	5	5	45.0166	244.223	4.50141	4.37641
3166	3143.64	5	5	9.89574	288.298	4.50017	5.2361
2321	2326.09	3	5	41.2154	203.491	4.50141	5.51899
2103	1124.4	3	5	30.1148	199.373	2.90986	5.79636
2735	445.729	5	5	26.6962	58.8687	4.81972	5.97387
2577	1367.06	3	5	46.059	141.108	3.54648	5.1798
1565	530.357	3	5	37.0761	78.2493	5.83309	4.49293
2169	1011.36	3	5	29.4444	132.393	4.87691	5.60601
2423	878.884	3	5	38.0051	329.744	4.50141	5.12506
4007	4683.7	1	1	46.0411	114.402	1.63662	2.54124
1999	1028.13	5	5	22.8379	-8.41807	5.77465	4.67814
2356	1203.09	3	5	34.9299	49.8363	2.59155	4.79866
2515	2697.08	3	5	14.4297	200.069	4.81972	5.26755
2096	1378.86	5	5	34.2722	246.251	3.22817	5.44813
2799	3233.12	5	5	41.0283	54.2685	5.77465	5.72282
1454	396.325	3	5	53.7357	293.552	2.59155	2.55161
1912	812.062	3	5	27.0993	1.42398	4.50141	4.8153
1755	382.416	3	5	28.4518	126.212	6.41127	5.23781
2760	2.80762	5	2	33.1616	73.5235	2.59155	4.18407
1439	288.805	3	5	28.581	325.893	2.90862	2.24903
2769	2761.39	3	5	33.9969	33.8884	6.39137	5.16522
1889	535.397	3	5	36.6295	9.62951	4.1831	4.59169
2402	3535.99	5	5	40.3081	367.139	6.09296	5.46347
2298	524.984	3	5	26.7251	343.754	6.09296	3.81872
3066	1155.12	5	5	26.8646	348.132	3.86479	4.96075
2897	2596.78	5	5	29.3738	141.444	7.08022	6.17326
1668	11.25	3	5	52.5047	123.937	5.20766	4.06633
2159	789.885	3	5	26.564	199.953	6.09296	5.84625
1829	1213.68	3	5	13.0201	172.231	5.45634	5.42179
3462	855.129	5	5	38.9676	308.152	5.73735	4.98257
2658	1726.3	3	5	45.2387	41.2517	4.66056	5.03225
3007	1157.43	5	5	25.4706	253.621	4.16196	6.15113
1674	45	3	5	37.8614	112.903	7.04789	4.6783
3046	2419.14	5	5	40.4144	40.8857	6.78802	6.71458
2978	813.05	5	5	36.4353	312.634	7.3662	4.80161
2852	407.493	3	5	31.0124	54.201	7.04789	5.95924
3175	2543.9	5	1	46.9835	31.325	4.81972	4.36485
2364	610.802	5	2	28.4363	277.471	7.68451	6.82947
2303	525.46	3	5	36.7507	113.587	6.09296	5.31094
2479	1263.03	3	5	39.4078	141.459	6.76191	5.39512
2870	2036.52	5	5	28.9093	237.474	6.69725	6.15373
3063	2087.64	5	5	43.0513	247.144	6.46971	6.13678
2186	48.7153	5	5	40.5986	306.038	6.72958	4.12185
3264	1133.88	5	5	34.4079	85.2274	5.13803	7.51997
3244	2187.02	5	5	24.1786	70.2803	7.7417	6.88323
2720	826.266	3	5	38.3178	205.829	7.3662	6.21326
1799	2.7181	3	5	11.3672	44.6938	8.95775	5.90507
3405	1643.85	5	2	43.3813	184.35	7.06903	5.83074
2444	1576.59	3	5	35.2789	321.636	8.44795	5.67546
3310	1206.17	5	5	33.7061	302.766	7.3662	5.91692
3305	447.924	5	1	10.2971	55.3672	5.13803	2.03218
2462	1235.66	3	5	37.5451	118.549	8.00282	5.28226
2444	788.321	3	5	31.0215	261.134	8.00282	5.87451
2595	1212.13	5	5	34.1807	228.974	10.5481	5.72768
2578	3970.5	3	5	19.3325	273.101	6.78677	5.36293
1910	12.6881	3	5	27.9218	28.4018	8.63944	5.1894
3036	2330.46	5	5	40.5589	197.966	6.72958	6.62421
2505	3678.46	5	5	32.6742	135.298	3.47685	4.85066
3261	2779.89	5	5	30.1399	81.9285	8.00282	6.84968
2818	297.727	5	5	30.4065	227.038	7.9506	6.06983
3142	1591.56	5	5	22.9081	120.297	6.41127	6.89015
3765	570.647	1	5	36.9823	178.155	7.04789	7.18263
2131	191.489	3	5	18.6572	74.1156	6.72958	5.86259
2930	2274.16	5	5	37.2606	196.519	7.3662	6.33408
2896	2389.48	5	5	32.6098	270.396	9.91268	6.18619
3328	363.454	5	5	48.4348	206.3	4.50141	5.09843
2634	2015.84	5	2	30.1001	314.1	8.63944	6.5064
3593	638.161	5	2	23.6828	243.481	8.00282	6.97746
2139	128.304	3	2	10.3469	137.166	6.47095	5.95994
3717	191.559	1	2	42.9246	148.864	8.06001	7.04927
2214	12.2789	3	5	30.4374	31.75	6.41127	5.23315
2340	1563.16	3	5	30.3902	319.297	8.95775	5.34981
3505	1568.2	5	5	23.9484	179.385	8.32113	7.40327
2581	872.84	5	5	31.2775	236.047	5.13803	5.868
2440	363.454	5	5	32.6916	250.475	6.41127	5.70907
2795	2463.02	3	5	27.1783	171.903	8.32113	5.98618
3787	1262.32	1	2	38.15	347.709	7.3662	6.81048
3095	1773.43	5	5	21.1871	102.28	8.00406	6.66607
3352	2266.36	5	5	22.3019	314.041	8.32113	6.2976
3206	1518.66	5	5	29.3736	-21.812	7.11752	6.94773
3422	2891.62	1	5	34.4267	110.228	6.41127	5.98724
3293	826.226	1	5	25.3008	271.007	5.77465	4.77832
2858	795.283	5	5	46.4992	136.003	7.68451	5.25562
2677	279.013	5	5	46.2553	159.919	6.09296	4.5793
3373	2855.92	5	5	34.3997	153.581	7.3662	7.36528
2639	973.033	3	5	23.9834	319.332	7.42339	4.73727
3380	3815.61	1	1	37.3217	107.607	7.04789	3.91253
3259	1560.72	5	2	32.9651	63.8216	6.46971	4.94969
2846	405.277	5	5	17.0675	300.769	7.68451	5.0562
2942	276.727	5	2	27.2191	137.641	6.72958	5.28315
3536	537.169	5	5	15.7695	28.3384	6.09296	7.50996
3682	2265	1	2	36.3464	47.2171	5.77465	4.09402
3085	1194.17	5	2	16.5799	378.736	4.81972	6.25129
3234	935.606	5	5	24.5158	201.933	6.41002	6.97323
3430	1871.7	5	5	36.3688	80.7547	5.77465	7.34148
3321	422.67	1	5	14.1086	90.0943	5.13803	5.96185
3301	1065	5	2	24.5798	31.1102	4.81972	4.58845
3719	664.437	1	5	38.02	144.759	5.45634	6.96174
2792	1926.67	3	5	39.1469	167.684	7.09514	6.06008
3796	1818.03	5	5	36.4538	326.518	5.7846	5.10036
2840	1030.28	3	2	28.1968	114.784	7.68451	5.11822
2424	1205.41	3	2	30.2038	146.366	7.11752	5.48672
3021	353.045	1	1	30.8795	197.246	4.50141	1.91912
3093	2295.09	5	2	19.8393	214.423	8.01276	5.48179
2911	1189.81	3	5	29.7738	2.90767	7.04789	5.73862
2634	608.051	3	5	44.5679	168.108	7.04789	5.57744
3778	3362.74	1	2	39.278	145.1	7.04913	3.90711
2589	276.514	5	5	32.3955	269.226	6.41127	5.59718
3356	1568.2	5	2	30.0944	89.137	6.41127	5.10274
3528	1876.49	5	2	33.2832	382.691	6.09296	6.44216
2530	195.598	5	2	42.1243	226.294	6.41127	5.64521
3098	381.101	3	2	37.7991	19.6196	5.77465	5.29136
3255	1327.65	3	5	34.8879	329.991	5.45634	6.39055
2717	447.493	3	2	37.6127	100.006	5.42525	4.98865
3438	784.992	1	1	42.985	201.145	5.45634	4.21928
2856	382.639	5	2	46.6778	303.141	4.81972	4.33876
2709	255.003	3	1	42.9378	142.2	4.50141	1.57225

## Sheet: Test
Density	ANN_result	MAPE
6.78677	5.36293	0.209796
8.63944	5.1894	0.399336
6.72958	6.62421	0.0156576
3.47685	4.85066	0.39513
8.00282	6.84968	0.144091
7.9506	6.06983	0.236557
6.41127	6.89015	0.0746933
7.04789	7.18263	0.0191173
6.72958	5.86259	0.128833
7.3662	6.33408	0.140116
9.91268	6.18619	0.375931
4.50141	5.09843	0.132629
8.63944	6.5064	0.246895
8.00282	6.97746	0.128125
6.47095	5.95994	0.0789695
8.06001	7.04927	0.125402
6.41127	5.23315	0.183758
8.95775	5.34981	0.402773
8.32113	7.40327	0.110304
5.13803	5.868	0.142072
6.41127	5.70907	0.109526
8.32113	5.98618	0.280605
7.3662	6.81048	0.0754425
8.00406	6.66607	0.167164
8.32113	6.2976	0.24318
7.11752	6.94773	0.0238553
6.41127	5.98724	0.0661378
5.77465	4.77832	0.172535
7.68451	5.25562	0.316075
6.09296	4.5793	0.248428
7.3662	7.36528	0.000125278
7.42339	4.73727	0.361845
7.04789	3.91253	0.444865
6.46971	4.94969	0.234945
7.68451	5.0562	0.342028
6.72958	5.28315	0.214936
6.09296	7.50996	0.232564
5.77465	4.09402	0.291036
4.81972	6.25129	0.297024
6.41002	6.97323	0.0878642
5.77465	7.34148	0.271328
5.13803	5.96185	0.160338
4.81972	4.58845	0.0479833
5.45634	6.96174	0.2759
7.09514	6.06008	0.145883
5.7846	5.10036	0.118286
7.68451	5.11822	0.333956
7.11752	5.48672	0.229125
4.50141	1.91912	0.573663
8.01276	5.48179	0.315867
7.04789	5.73862	0.185767
7.04789	5.57744	0.208636
7.04913	3.90711	0.445731
6.41127	5.59718	0.126978
6.41127	5.10274	0.204099
6.09296	6.44216	0.0573119
6.41127	5.64521	0.119487
5.77465	5.29136	0.0836918
5.45634	6.39055	0.171216
5.42525	4.98865	0.0804763
5.45634	4.21928	0.226719
4.81972	4.33876	0.099789
4.50141	1.57225	0.650721
		0.206878
